# Supplementary material for: Improved assays to measure and characterize the inducible HIV reservoir
Source: PubMed Central journal article supplement (PMC6197429; doi:10.1016/j.ebiom.2018.09.036), 2018-10-11

Supplementary figure 1.

A. mQVOA

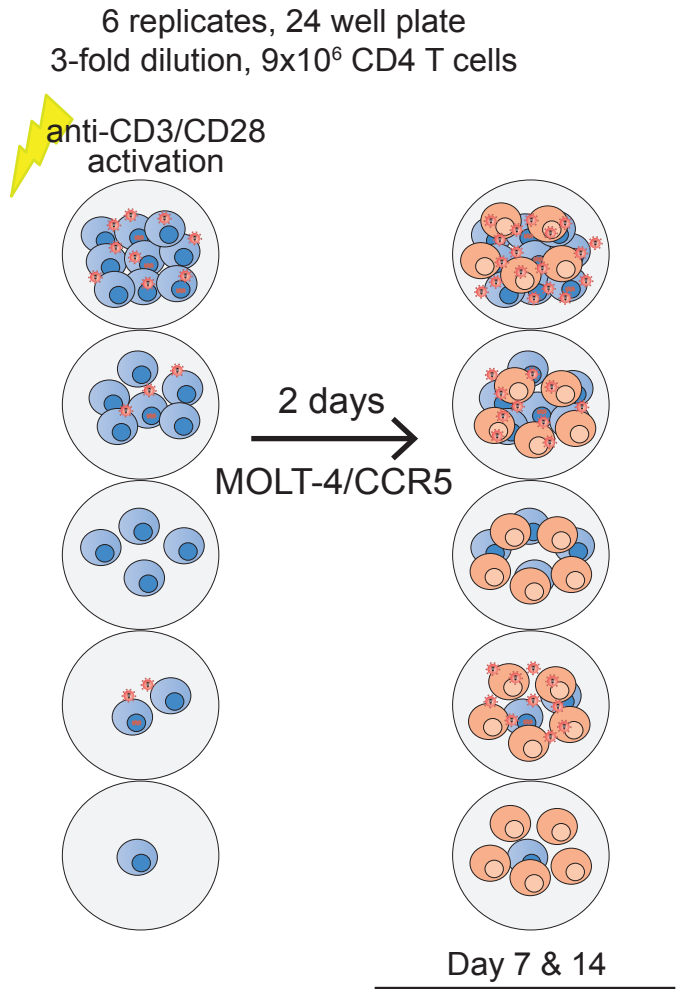

|                       |                          |
|-----------------------|--------------------------|
| Specimen              | Supernatant              |
| RNA extraction method | Aptima HIV-1 (Hologic) ↓ |
| PCR method            | RT-PCR                   |
| Target                | <i>pol</i>               |

B. Inducible RNA Assays in limiting dilution

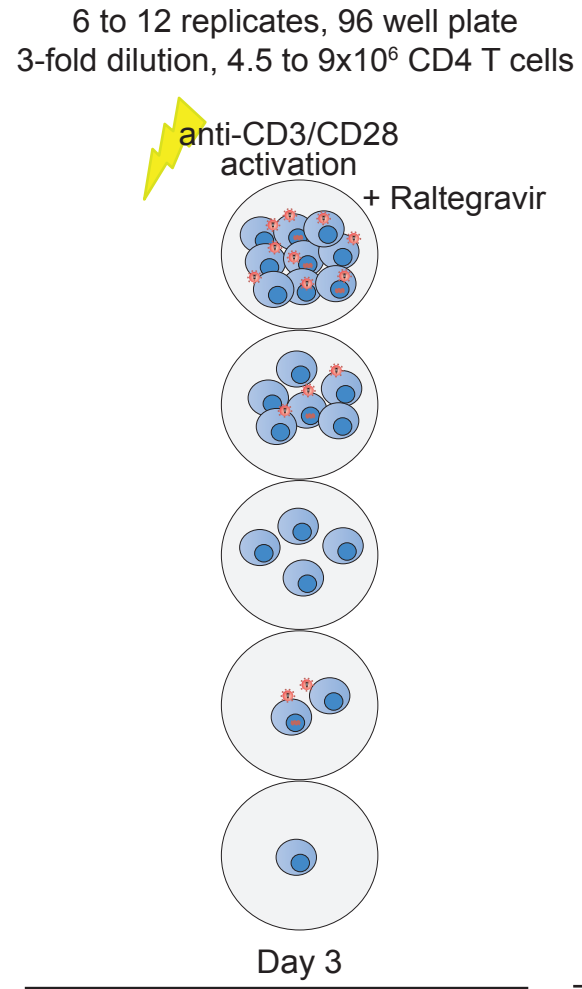

|                       |                          |                              |
|-----------------------|--------------------------|------------------------------|
| Specimen              | Supernatant              | Cells                        |
| RNA extraction method | Aptima HIV-1 (Hologic) ↓ | Magmax ↓                     |
| PCR method            | ddPCR                    | ddPCR                        |
| Target                | <i>gag</i>               | <i>gag</i><br><i>tat-rev</i> |

C. Inducible RNA Assay in bulk

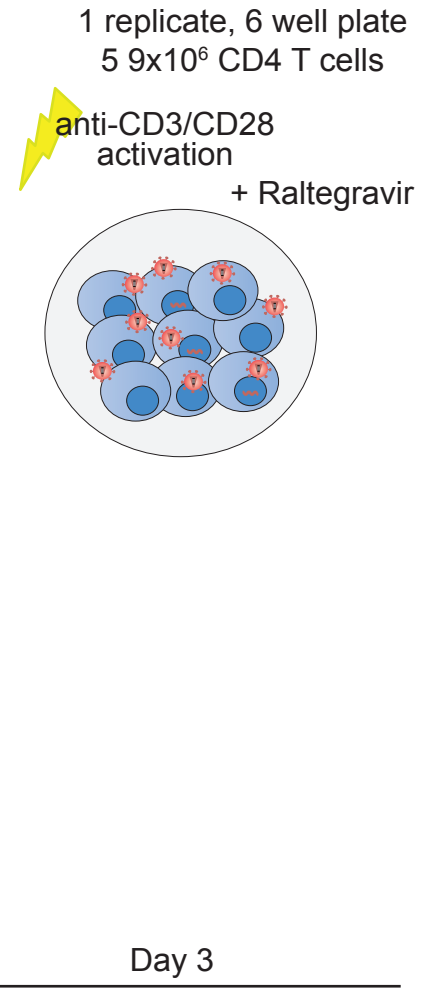

|                       |                          |
|-----------------------|--------------------------|
| Specimen              | Supernatant              |
| RNA extraction method | Aptima HIV-1 (Hologic) ↓ |
| PCR method            | ddPCR                    |
| Target                | <i>gag</i>               |

# Supplementary Figure 2

A.

mQVOA

Inducible RNA

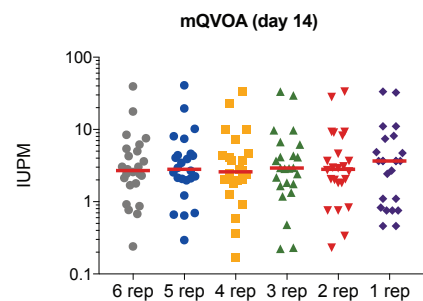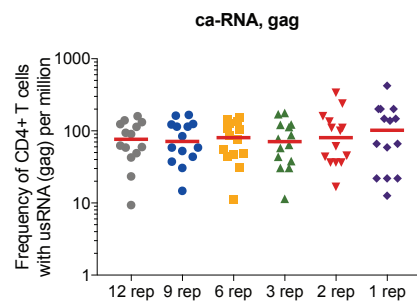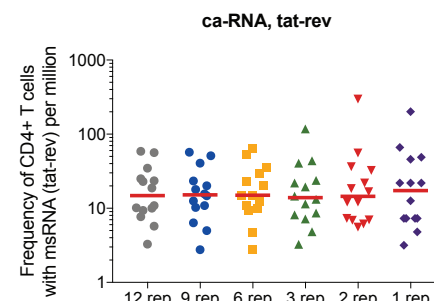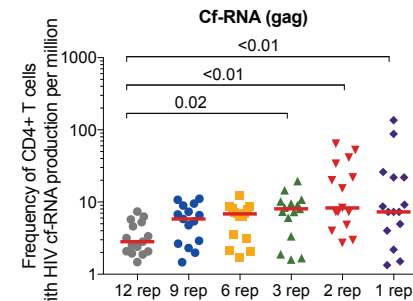

B.

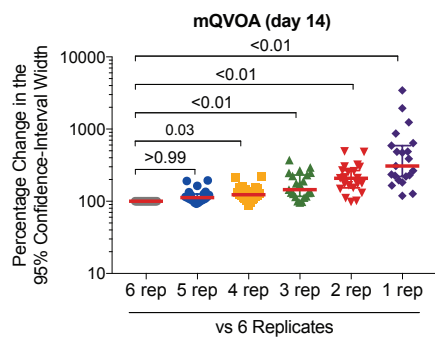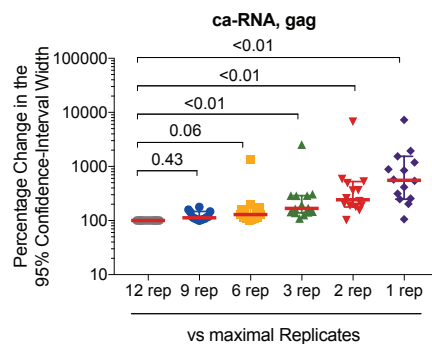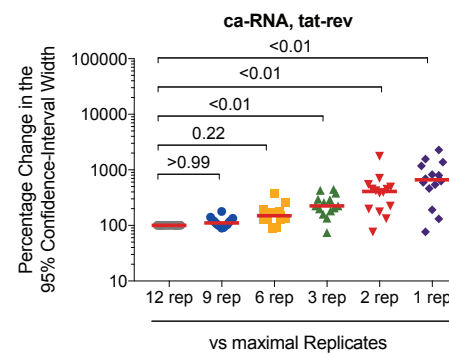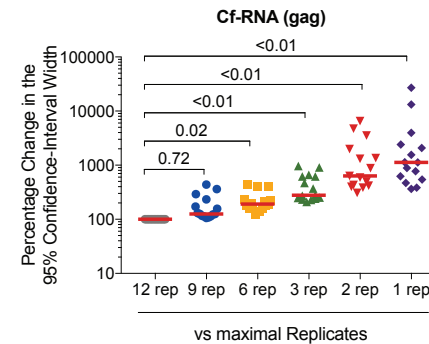

C.

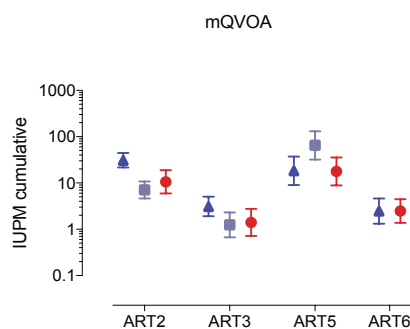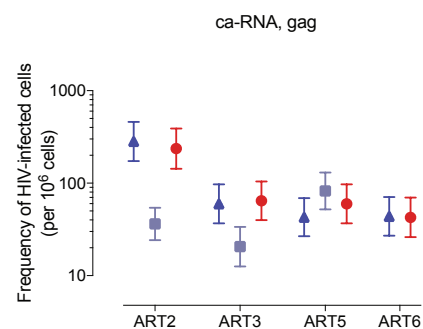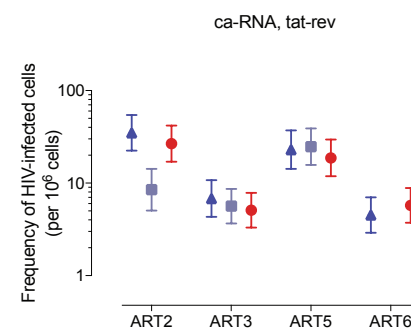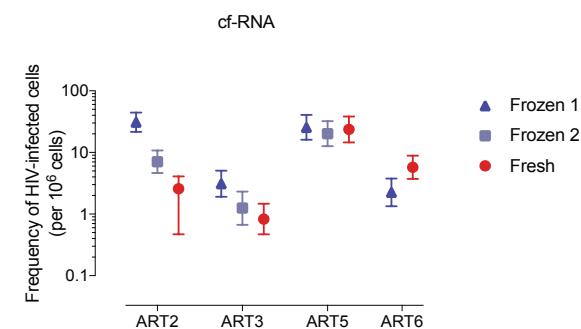

# Supplementary figure 3

ART1

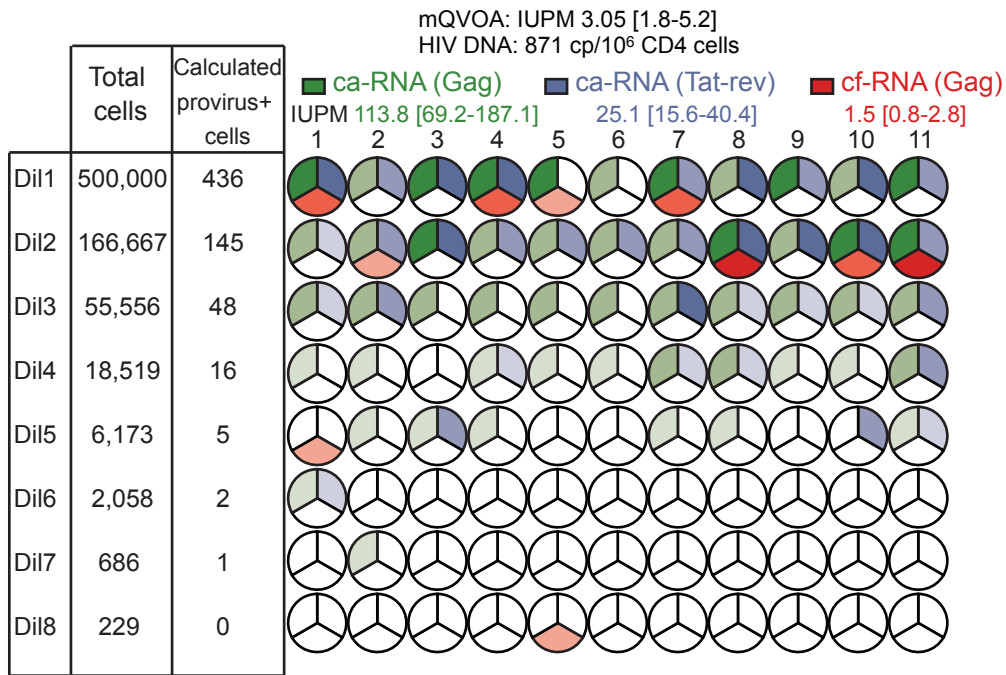

ART5

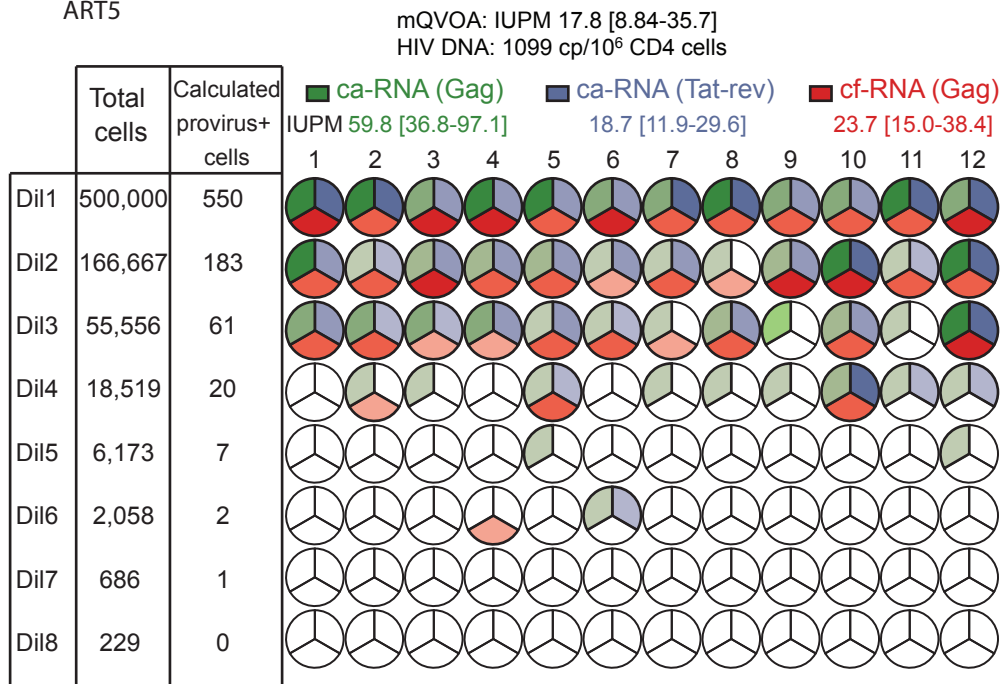

Supplement: mmc2.pdf [file mmc2.pdf]
